# Supplementary material
Source: PubMed Central journal article supplement (PMC4994714)
Supplement: jo6b00800_si_001.pdf [file jo6b00800_si_001.pdf]

# Phenol Derivatives as Coupling Partners with Alkylsilicates in Photoredox/Nickel Dual Catalysis

Niki R. Patel and Gary A. Molander\*

*Roy and Diana Vagelos Laboratories, Department of Chemistry, University of Pennsylvania,  
Philadelphia, Pennsylvania 19104-6323*

\*To whom correspondence should be addressed. E-mail: gmolandr@sas.upenn.edu

## Supporting Information

|                                                                                                                                               |           |
|-----------------------------------------------------------------------------------------------------------------------------------------------|-----------|
| <b>Key to Abbreviated Terms</b>                                                                                                               | <b>S2</b> |
| <b>General Considerations</b><br>Comments regarding origins of starting materials, purification of solvents,<br>and spectroscopic techniques. | <b>S2</b> |
| <b>Reaction Optimization Control Studies for Aryl Triflate Cross-Coupling</b>                                                                 | <b>S4</b> |
| <b><math>^1\text{H}</math>, <math>^{13}\text{C}</math>, and <math>^{19}\text{F}</math> NMR Spectra of Synthesized Compounds</b>               | <b>S6</b> |

## Key to Abbreviated Terms:

bpy: 2,2'-bipyridyl  
CFL: Compact fluorescent light

LED: Light-emitting diode  
dtbbpy: 4,4'-di-*tert*-butyl-2,2'-dipyridyl

## General Considerations

All chemical transformations requiring inert atmospheric conditions utilized Schlenk line techniques with a 5-port dual-bank manifold. Argon was used to provide such an atmosphere. NMR Spectra ( $^1\text{H}$ ,  $^{13}\text{C}$  { $^1\text{H}$ },  $^{19}\text{F}$ ) were performed at 298 K.  $^1\text{H}$  NMR spectra obtained in  $\text{CDCl}_3$  were referenced to residual non-deuterated chloroform ( $\delta$  7.26) in the deuterated solvent.  $^{13}\text{C}$  { $^1\text{H}$ } NMR spectra obtained in  $\text{CDCl}_3$  were referenced to chloroform ( $\delta$  77.2). Reactions were monitored by GC/MS, HPLC,  $^1\text{H}$  NMR, and/or by TLC on silica gel plates (60 Å porosity, 250  $\mu\text{m}$  thickness). TLC analysis was performed using hexanes/EtOAc as the eluant and visualized using permanganate stain and/or UV light. Silica plugs utilized flash silica gel (60 Å porosity, 32-63  $\mu\text{m}$ ). Flash chromatography was accomplished using an automated system (visualizing at 254 nm, monitoring at 280 nm) with silica cartridges (60 Å porosity, 20-40  $\mu\text{m}$ ). Solvents were purified either by distillation over sodium or  $\text{CaH}_2$  or by use of drying cartridges through a solvent delivery system. Irradiation of reaction vessels was accomplished either using standard 26 W CFLs or LEDs (blue or white). The choice of light source did not appear to have any effect on reaction success. A fan was employed to ensure reactions remained at or near rt when using either CFLs or LEDs.

### Chemicals:

Deuterated NMR solvents,  $\text{MgSO}_4$ ,  $\text{CH}_2\text{Cl}_2$ , pentane, hexanes, and  $\text{Et}_2\text{O}$  were used as purchased.  $\text{Et}_3\text{N}$  and *i*- $\text{Pr}_2\text{NH}$  were purchased from commercial suppliers and distilled from  $\text{CaH}_2$  prior to use. THF was purchased from commercial suppliers and dried *via* a solvent delivery system. Catechol was purchased and recrystallized from refluxing hexanes or heptanes. DMF (99.8%, extra dry) was stored over 4 Å molecular sieves.  $\text{NiCl}_2\cdot\text{dme}$  (min. 97%) and  $\text{RuCl}_3\cdot 3\text{H}_2\text{O}$  were purchased commercially. Phenol derivatives were either purchased from commercial suppliers or prepared in-house. The aryl triflates **2a**, **2b**, **2c**, **2d**, and **2e** were purchased from commercial suppliers and used without further purification. The following aryl triflates, -tosylates, and -mesylates were prepared according to literature procedures: 4-cyanophenyl

trifluoromethanesulfonate (**2f**),<sup>1</sup> 4-(trifluoromethyl)phenyl trifluoromethanesulfonate (**2g**),<sup>2</sup> 3-(trifluoromethyl)phenyl trifluoromethanesulfonate (**2h**),<sup>1</sup> 4-fluorophenyl trifluoromethanesulfonate (**2n**),<sup>2</sup> 4-formylphenyl trifluoromethanesulfonate (**2o**),<sup>3</sup> 4-benzoylphenyl trifluoromethanesulfonate (**2p**),<sup>4</sup> 3-cyanophenyl trifluoromethanesulfonate (**2q**),<sup>1</sup> 3-fluorophenyl trifluoromethanesulfonate (**2r**),<sup>5</sup> 4-bromophenyl trifluoromethanesulfonate (**2s**),<sup>6</sup> 4-acetylphenyl 4-methylbenzenesulfonate (**2i**),<sup>7</sup> naphthalen-1-yl 4-methylbenzenesulfonate (**2j**),<sup>6</sup> 3-(trifluoromethyl)phenyl 4-methylbenzenesulfonate (**2k**),<sup>8</sup> 4-acetylphenyl methanesulfonate (**2l**),<sup>6</sup> naphthalen-1-yl methanesulfonate (**2m**).<sup>6</sup> Ru(bpy)<sub>3</sub>(PF<sub>6</sub>)<sub>2</sub> was prepared in-house by the procedure outlined in our previous reports.<sup>9</sup> Silicates were prepared from their corresponding alkyltrimethoxysilanes. Information (preparation protocols, characterization etc.) for all silicates can be found in our previous reports.<sup>10</sup>

---

<sup>1</sup> Lee, D.-Y.; Hartwig, J. F. *Org. Lett.* **2005**, *7*, 1169.

<sup>2</sup> Mori, A.; Mizusaki, T.; Ikawa, T.; Maegawa, T.; Monguchi, Y.; Sajiki, H. *Chem. Eur. J.* **2007**, *13*, 1432.

<sup>3</sup> Maegawa, T.; Kitamura, Y.; Sako, S.; Udzo, T.; Sakurai, A.; Tanaka, A.; Kobayashi, Y.; Endo, K.; Bora, U.; Kurita, T.; Kozaki, A.; Monguchi, Y.; Sajiki, H. *Chem. Eur. J.* **2007**, *13*, 5937.

<sup>4</sup> Zhao, B.; Lu, X. *Org. Lett.* **2006**, *8*, 5987.

<sup>5</sup> Stang, P. J.; Anderson, A. G. *J. Org. Chem.* **1976**, *41*, 781.

<sup>6</sup> Chung, C. W. Y.; Toy, P. H. *Tetrahedron* **2005**, *61*, 709.

<sup>7</sup> Kuroda, J.; Inamoto, K.; Hiroya, K.; Doi, T. *Eur. J. Org. Chem.* **2009**, 2251.

<sup>8</sup> Munday, R. H.; Martinelli, J. R.; Buchwald, S. L. *J. Am. Chem. Soc.* **2008**, *130*, 2754.

<sup>9</sup> Mabrouk, P.A.; Wrighton, M. S. *Inorg. Chem.* **1986**, *25*, 526.

<sup>10</sup> (a) Jouffroy, M.; Primer, D.; Molander, G. A. *J. Am. Chem. Soc.*, **2016**, *138*, 475. (b) Patel, N. R., Kelly, C. B., Jouffroy, M., Molander, G. A. *Org Lett.* **2016**, *18*, 764.

## Reaction Optimization and Control Studies for Aryl Triflate Cross-Coupling

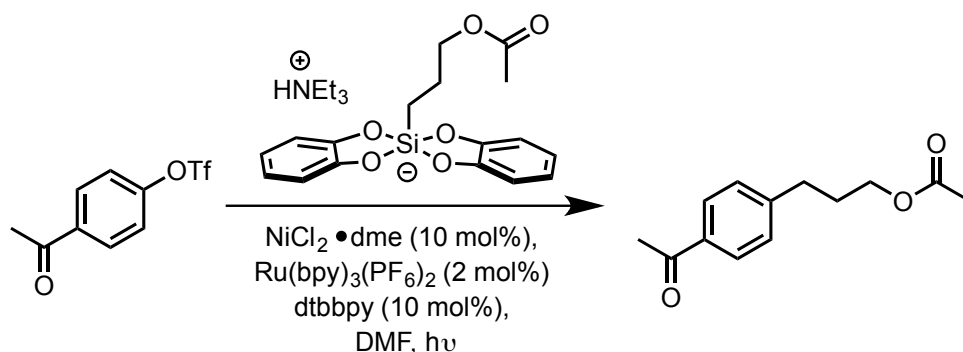

| experiment # | conditions                                                                                                                                    | conversion (determined by HPLC) |
|--------------|-----------------------------------------------------------------------------------------------------------------------------------------------|---------------------------------|
| 1            | 5 mol % $\text{NiCl}_2 \cdot \text{dme}$ , 5 mol % $\text{dtbbpy}$<br>1.2 equiv alkylsilicate<br>(not preforming Ni-ligand complex)<br>(24 h) | 84%                             |
| 2            | 5 mol% $\text{NiCl}_2 \cdot \text{dme}$ , 5 mol % $\text{dtbbpy}$<br>1.2 equiv alkylsilicate<br>(preforming Ni-ligand complex) (24 h)         | 87%                             |
| 3            | 10 mol % $\text{NiCl}_2 \cdot \text{dme}$ , 10 mol %<br>$\text{dtbbpy}$<br>1.2 equiv alkylsilicate (24 h)                                     | 95%                             |
| 4            | 5 mol % $\text{NiCl}_2 \cdot \text{dme}$ , 5 mol % $\text{dtbbpy}$<br>1.5 equiv alkylsilicate (24 h)                                          | 87%                             |
| 5            | 10 mol % $\text{NiCl}_2 \cdot \text{dme}$ , 10 mol %<br>$\text{dtbbpy}$<br>1.5 equiv alkylsilicate (24 h)                                     | 98%                             |
| 6            | 10 mol % $\text{NiCl}_2 \cdot \text{dme}$ , 10 mol %<br>$\text{dtbbpy}$<br>1.5 equiv alkylsilicate (36 h)                                     | 100%                            |

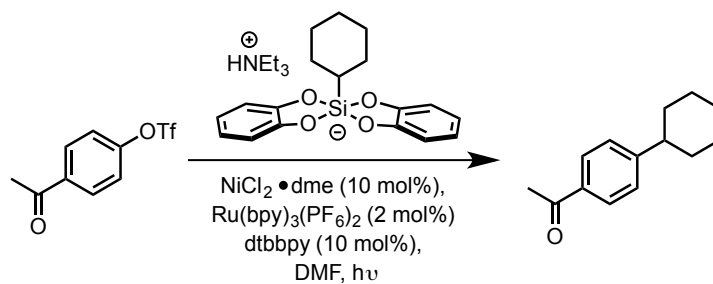

| experiment # | conditions                          | yield (determined by HPLC) |
|--------------|-------------------------------------|----------------------------|
| 1            | no light                            | 0%                         |
| 2            | no Ru photocatalyst                 | 10%                        |
| 3            | no $\text{NiCl}_2 \cdot \text{dme}$ | 0%                         |

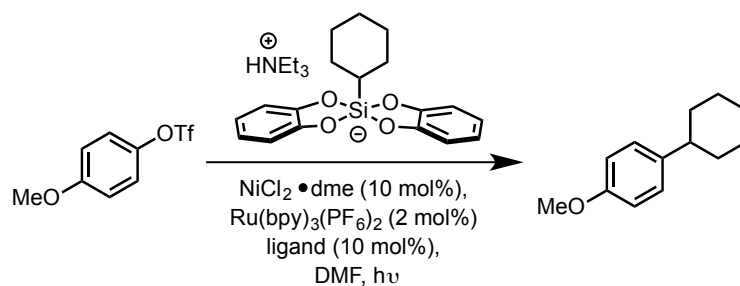

| experiment # | ligand                  | yield (determined by HPLC) |
|--------------|-------------------------|----------------------------|
| 1            | 2,2':6',2''-terpyridine | 0%                         |
| 2            | 2,2'-bis(2-oxazoline)   | 0%                         |
| 3            | neocuproine             | 0%                         |

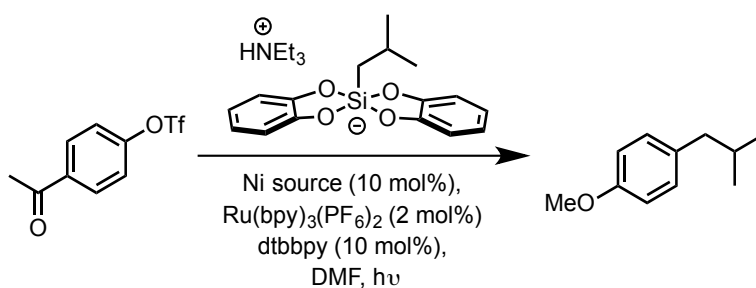

| experiment # | Ni source                 | yield                   |
|--------------|---------------------------|-------------------------|
| 1            | $\text{Ni}(\text{COD})_2$ | 60% (isolated yield)    |
| 2            | $\text{Ni}(\text{OTf})_2$ | 0% (determined by HPLC) |

# $^1\text{H}$ , $^{13}\text{C}$ , and $^{19}\text{F}$ NMR Spectra of Synthesized Compounds

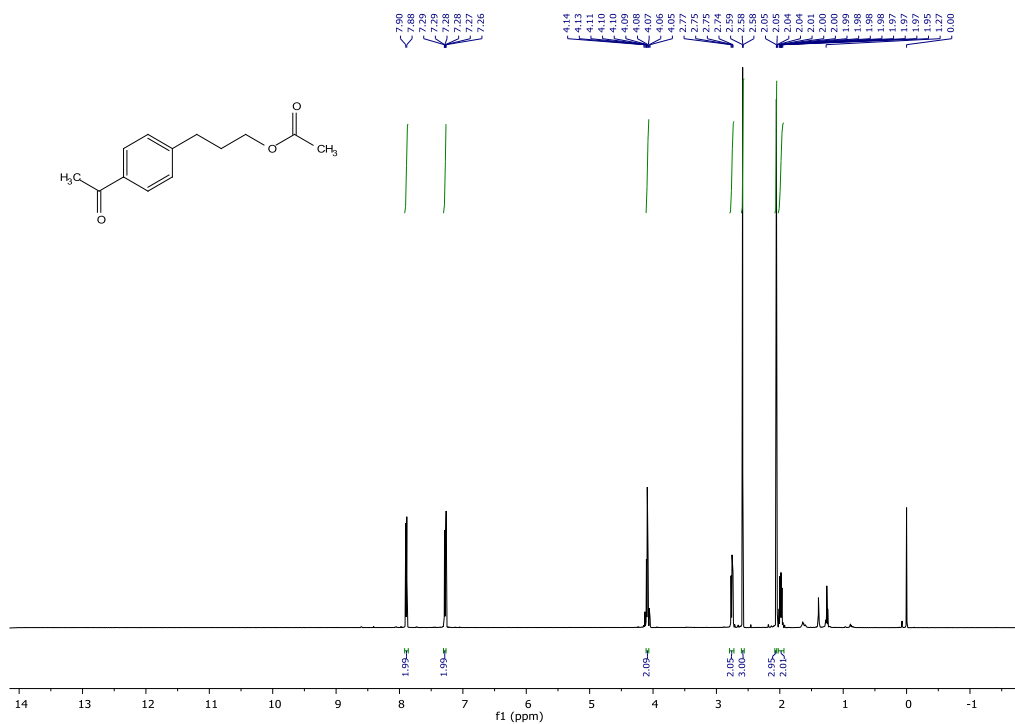

$^1\text{H}$  NMR spectrum of 3-(4-acetylphenyl)propyl acetate (**3a**)

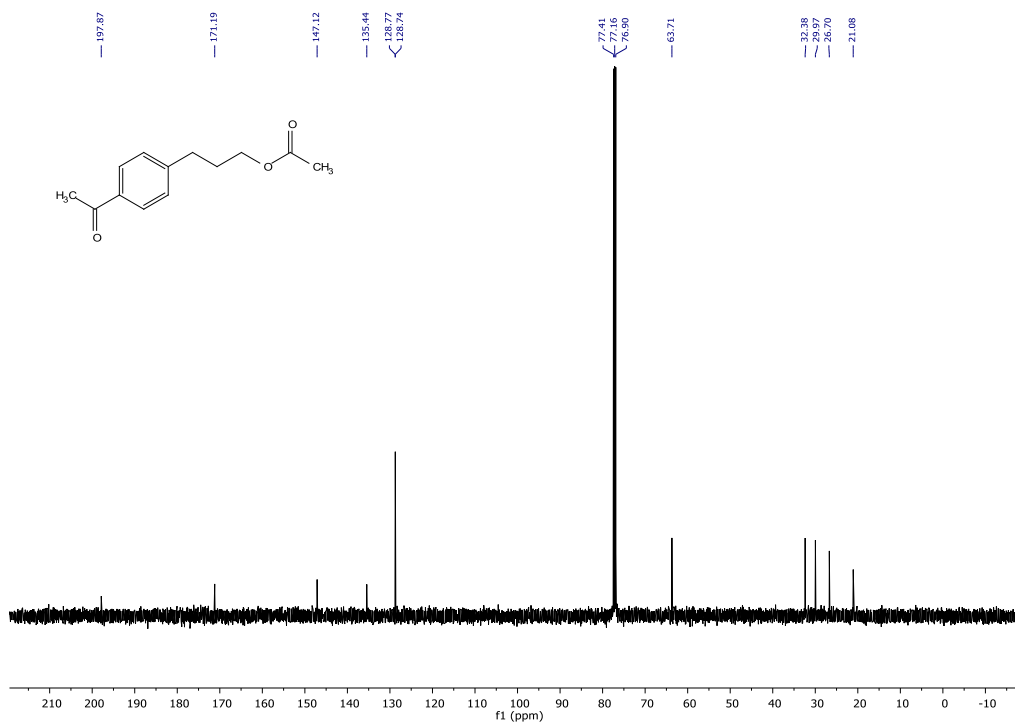

$^{13}\text{C}$   $\{^1\text{H}\}$  NMR spectrum of 3-(4-acetylphenyl)propyl acetate (**3a**)

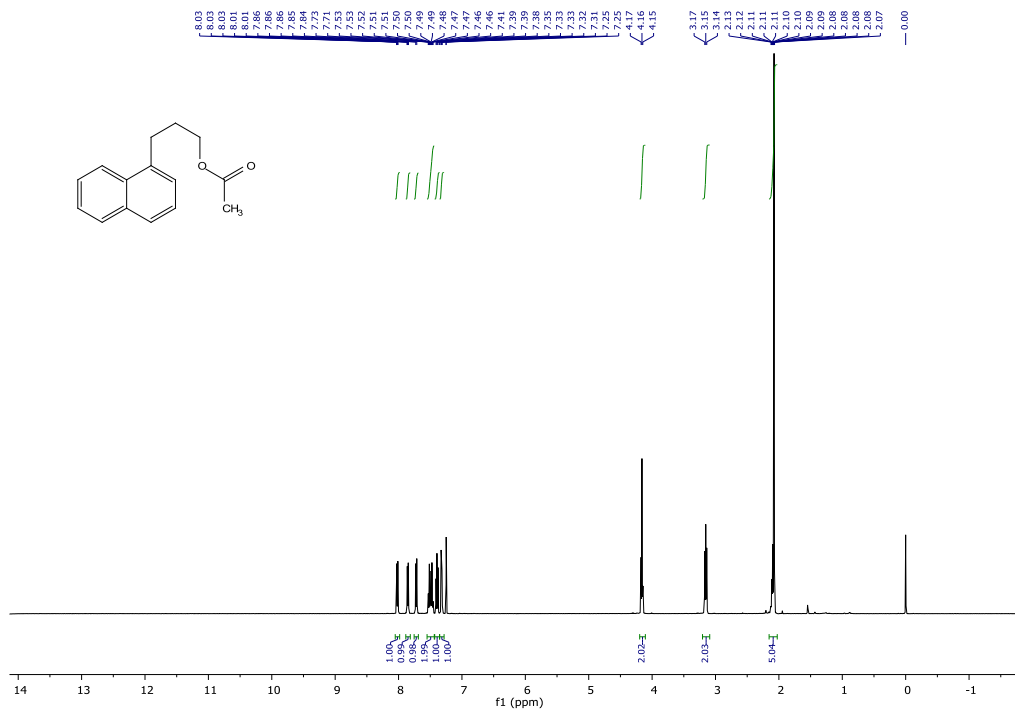

**<sup>1</sup>H NMR spectrum of 3-(naphthalene-1-yl)propyl acetate (3c)**

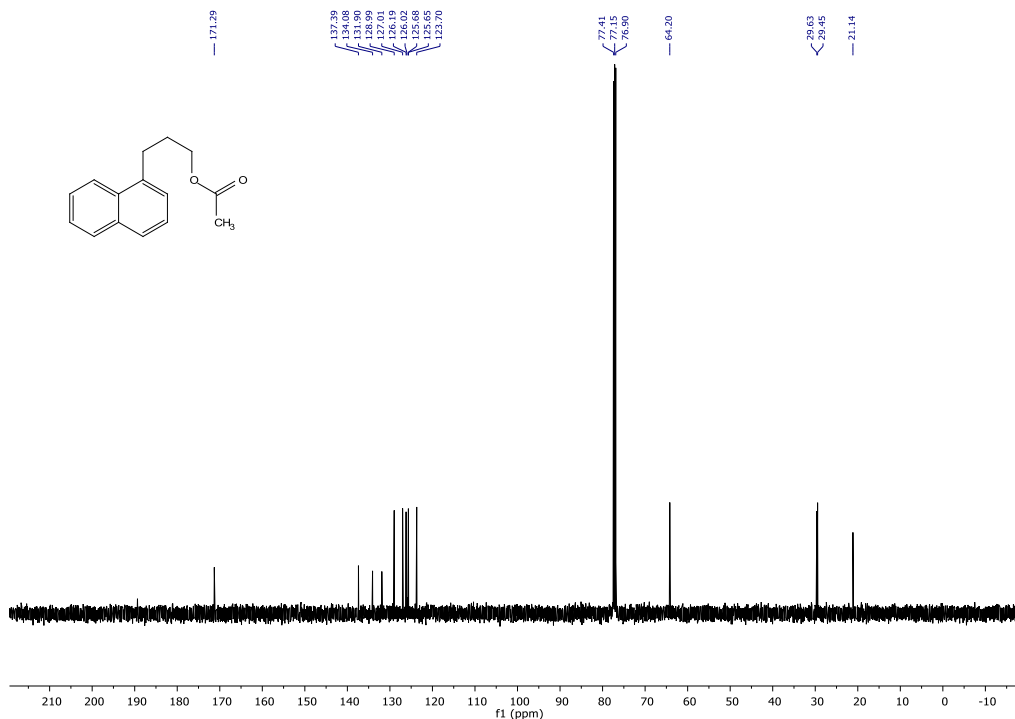

**<sup>13</sup>C {<sup>1</sup>H} NMR spectrum of 3-(naphthalene-1-yl)propyl acetate (3c)**

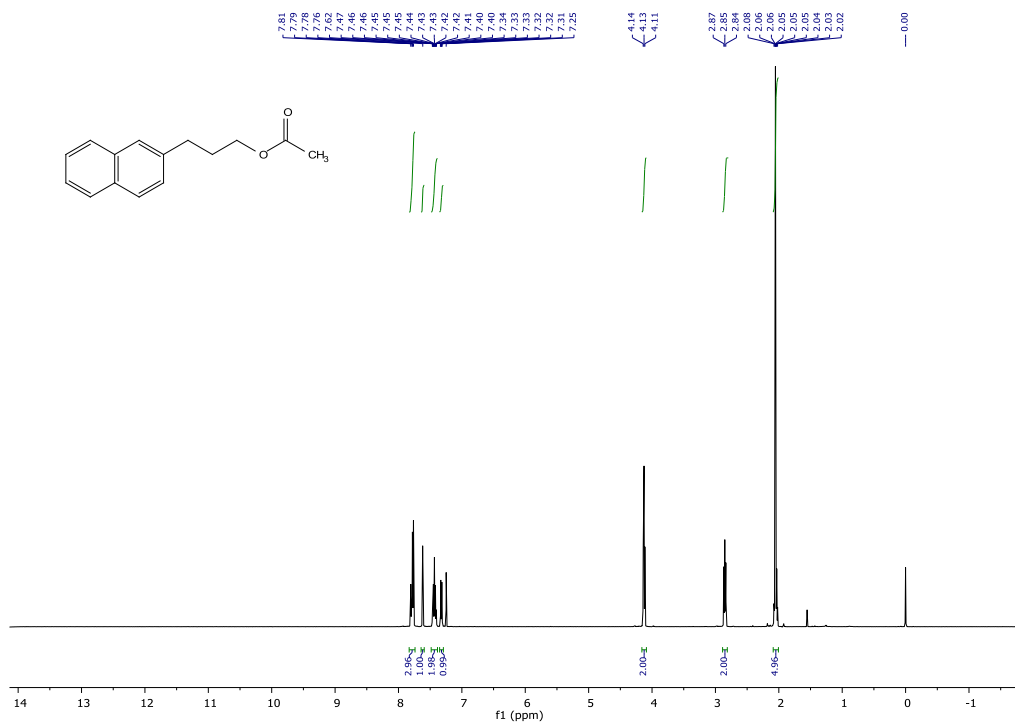

<sup>1</sup>H NMR spectrum of 3-(naphthalene-2-yl)propyl acetate (**3d**)

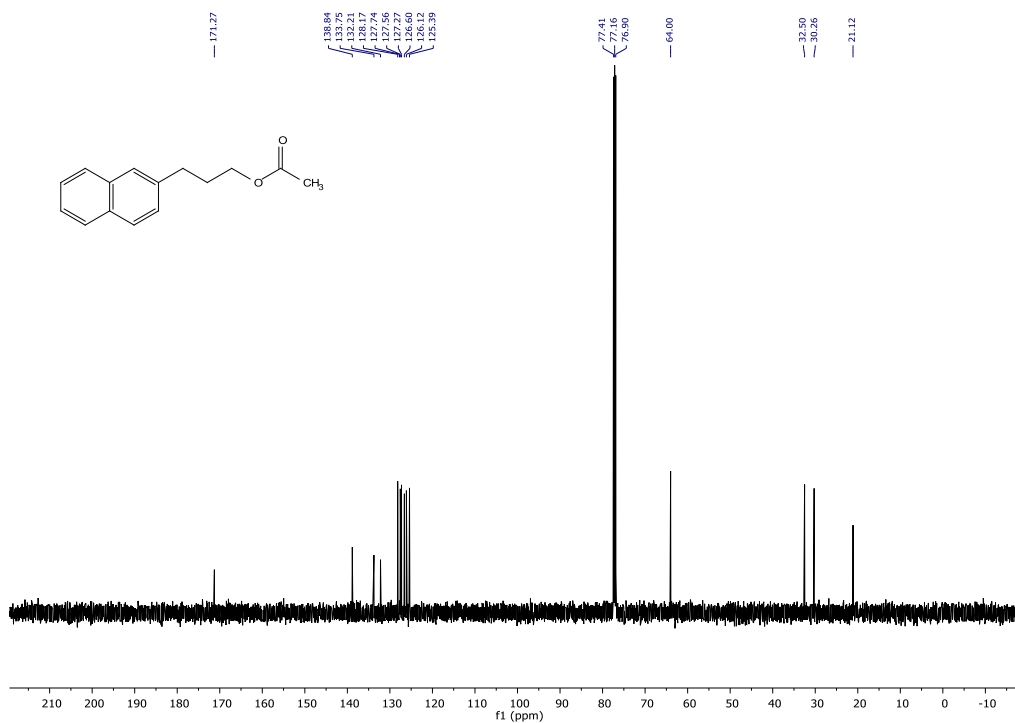

<sup>13</sup>C {<sup>1</sup>H} NMR spectrum of 3-(naphthalene-2-yl)propyl acetate (**3d**)



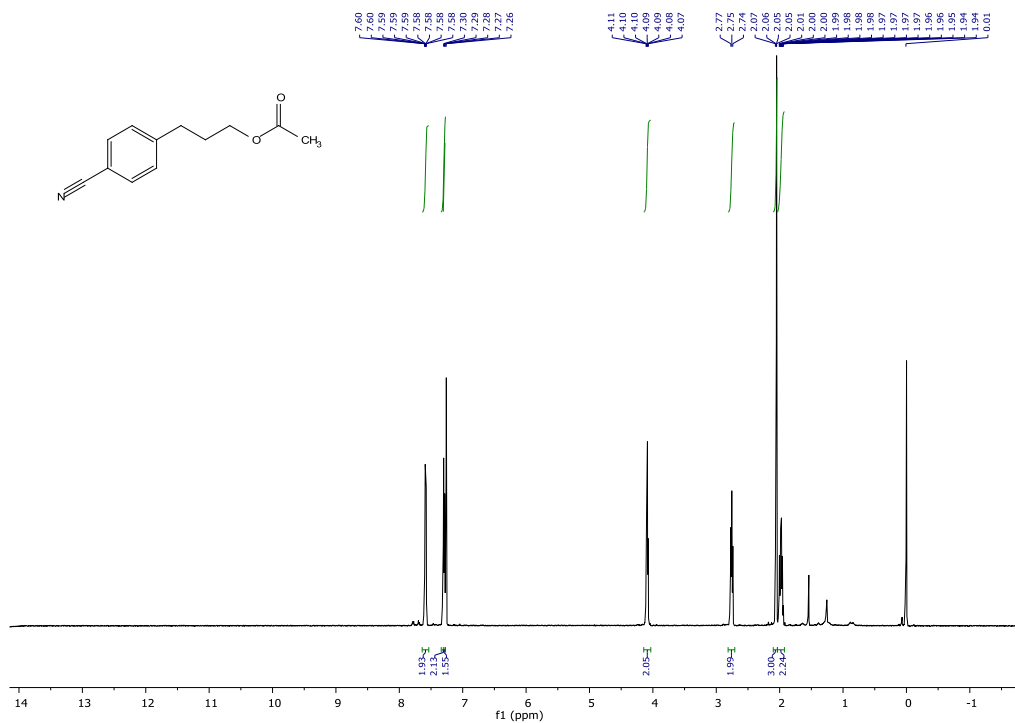

<sup>1</sup>H NMR spectrum of 3-(4-cyanophenyl)propyl acetate (**3f**)

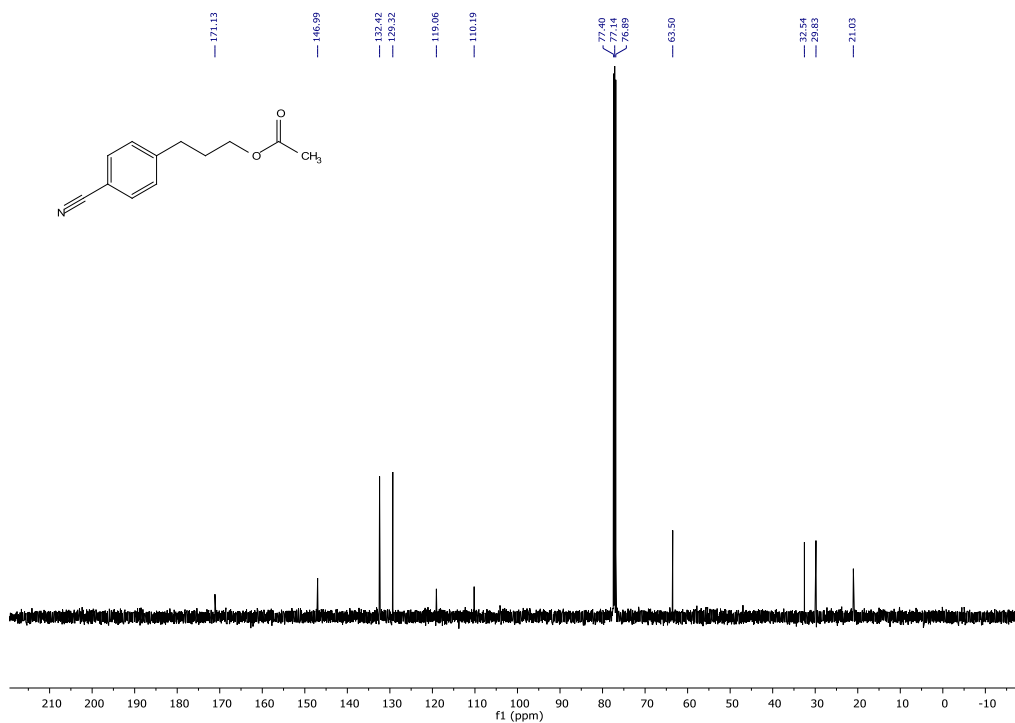

<sup>13</sup>C {<sup>1</sup>H} NMR spectrum of 3-(4-cyanophenyl)propyl acetate (**3f**)

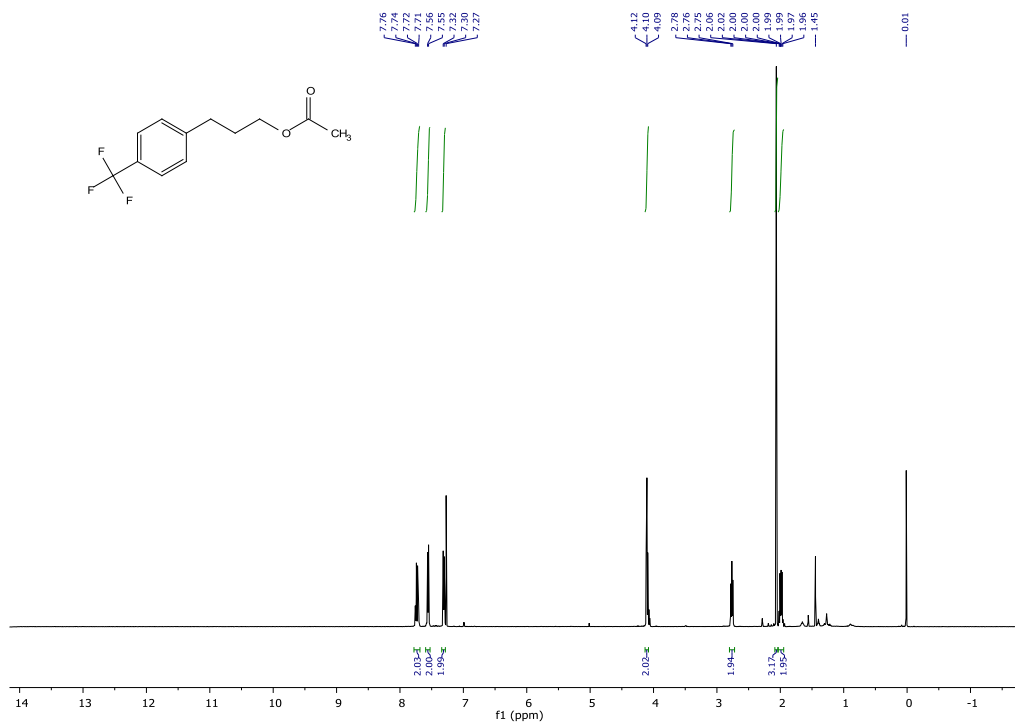

**<sup>1</sup>H NMR spectrum of 3-(4-(trifluoromethyl)phenyl)propyl acetate (3g)**

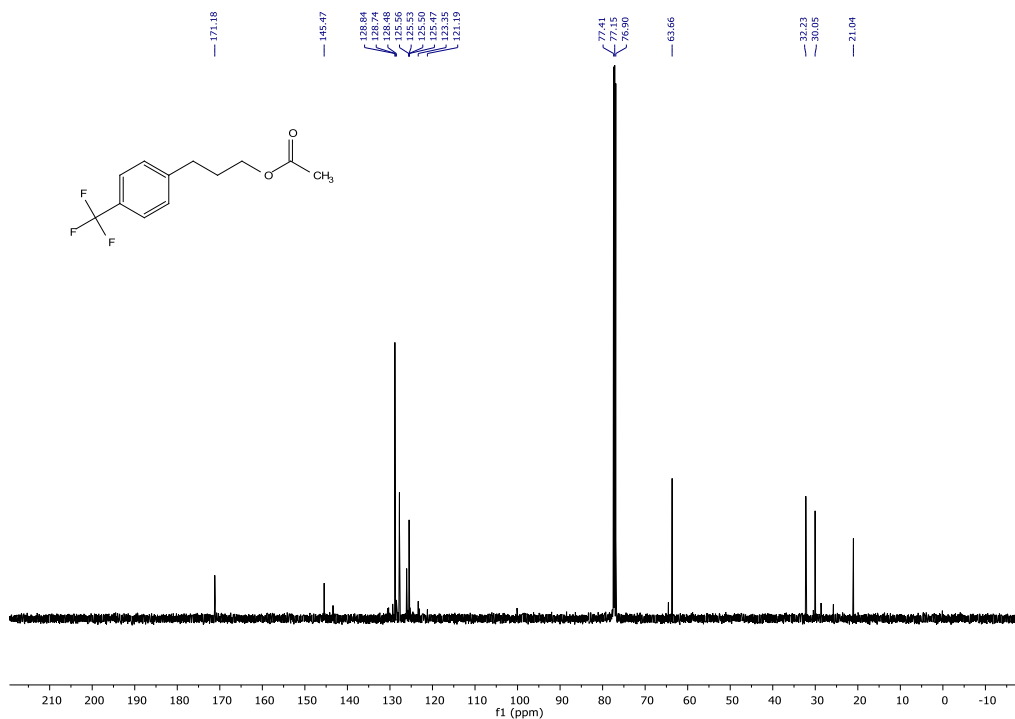

**<sup>13</sup>C {<sup>1</sup>H} NMR spectrum of 3-(4-(trifluoromethyl)phenyl)propyl acetate (3g)**

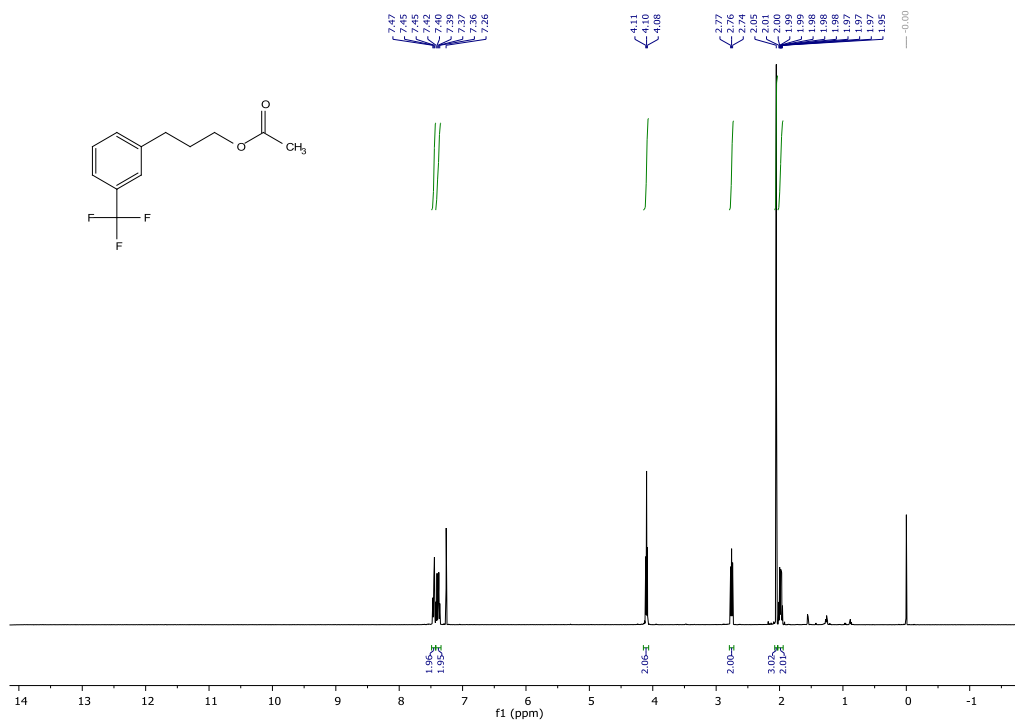

<sup>1</sup>H NMR spectrum of 3-(3-(trifluoromethyl)phenyl)propyl acetate (**3h**)

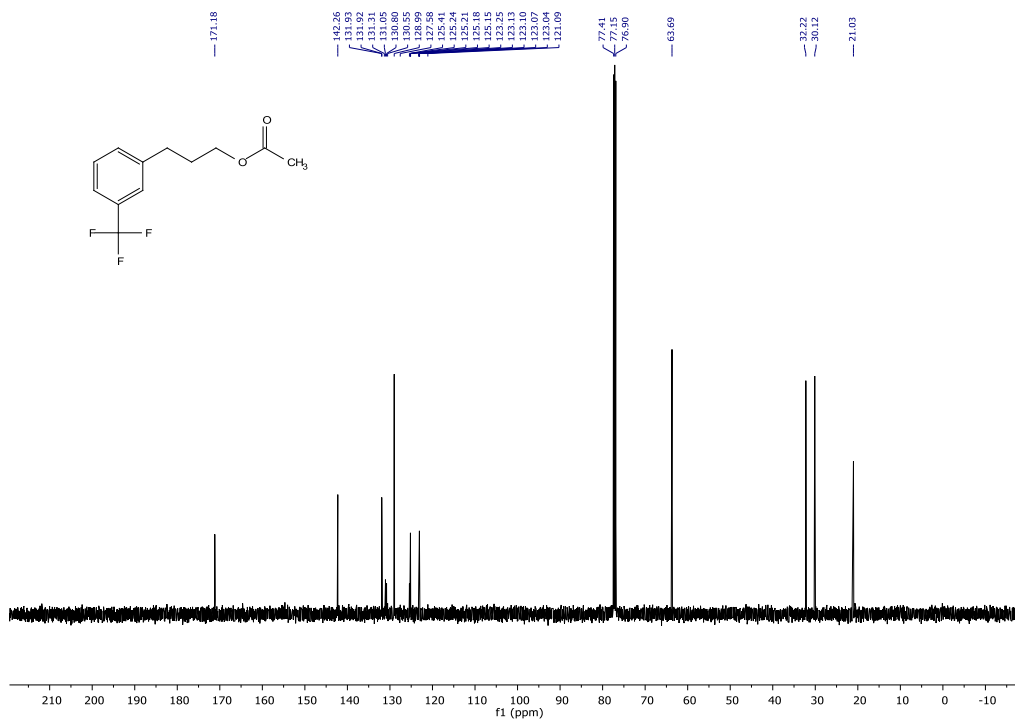

<sup>13</sup>C {<sup>1</sup>H} NMR spectrum of 3-(3-(trifluoromethyl)phenyl)propyl acetate (**3h**)

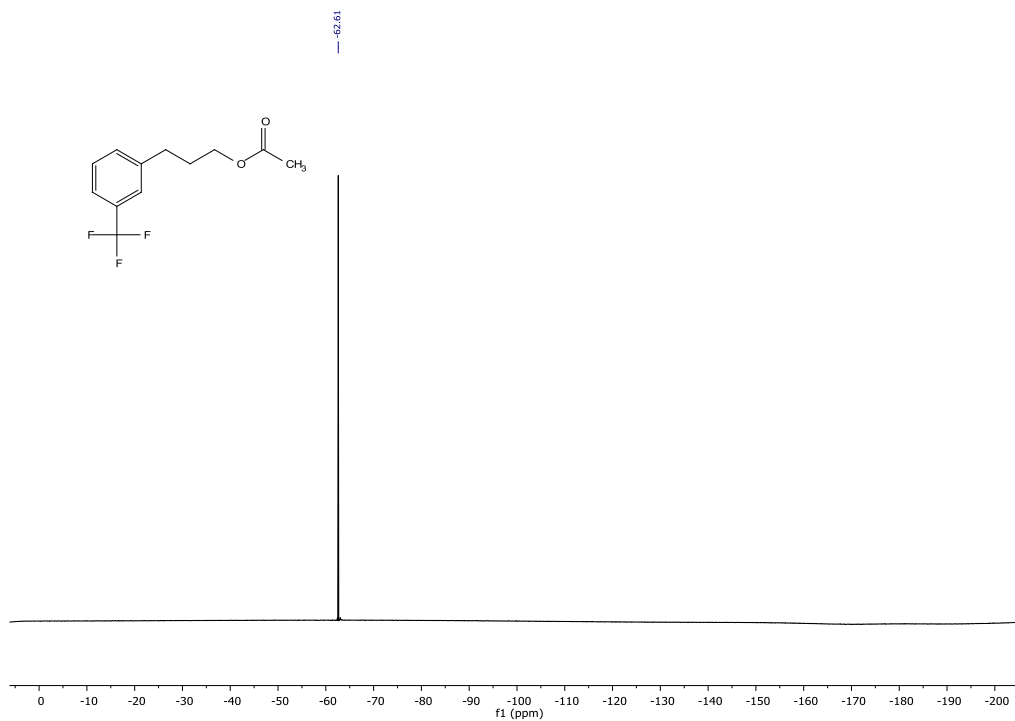

$^{19}\text{F}$  NMR spectrum of 3-(3-(trifluoromethyl)phenyl)propyl acetate (**3h**)

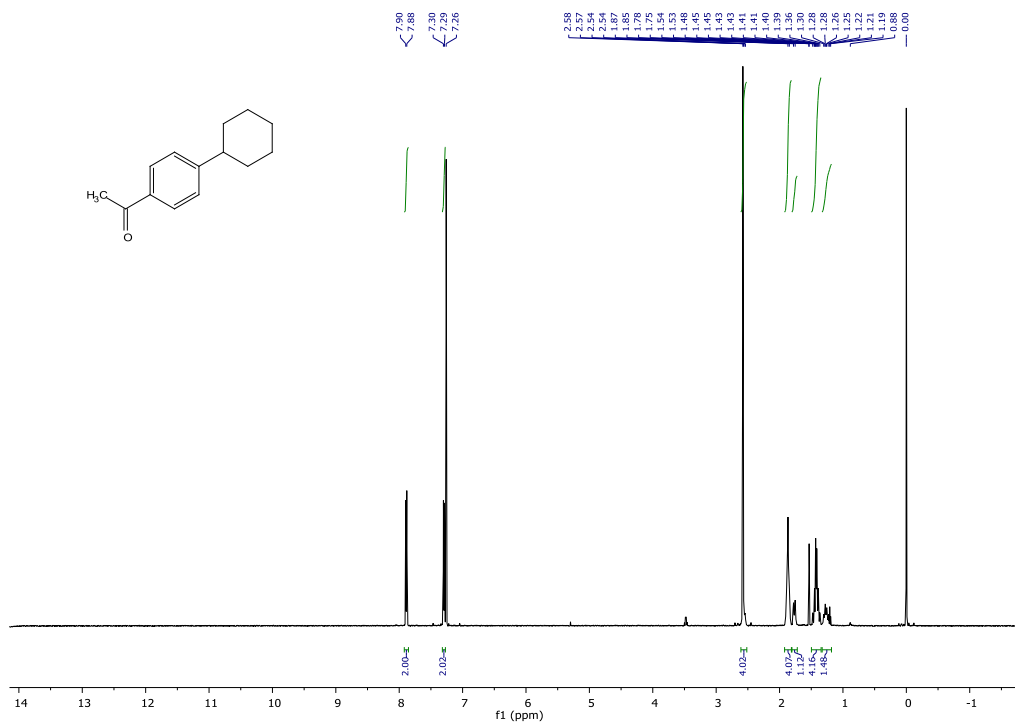

<sup>1</sup>H NMR spectrum of 1-(4-cyclohexylphenyl)ethanone (**3i**)

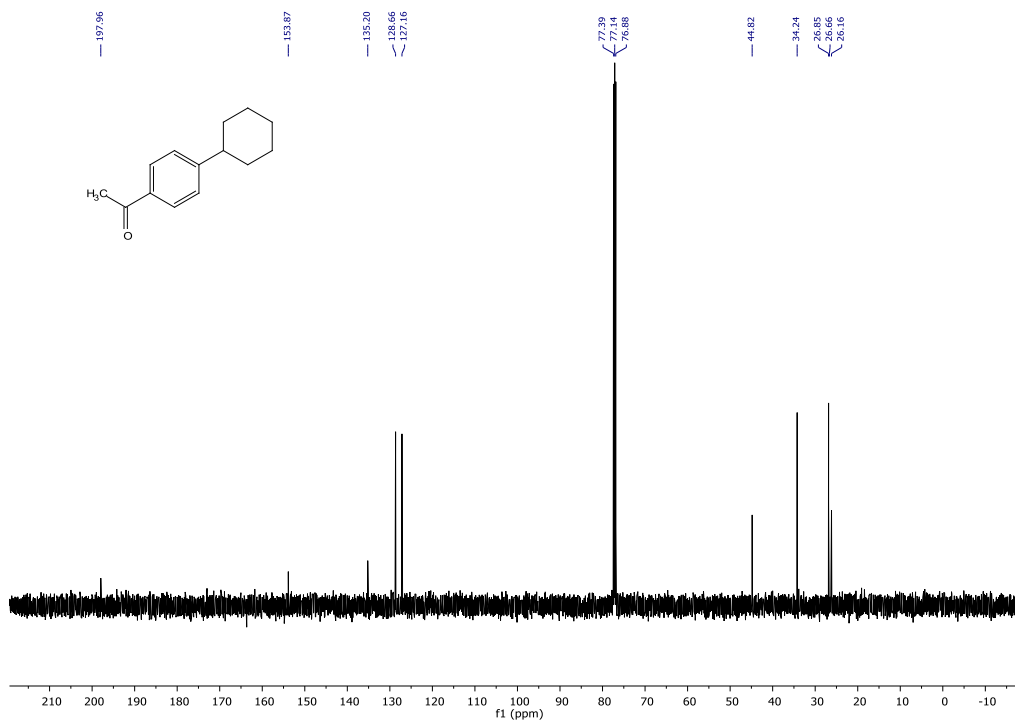

<sup>13</sup>C {<sup>1</sup>H} NMR spectrum of 1-(4-cyclohexylphenyl)ethanone (**3i**)

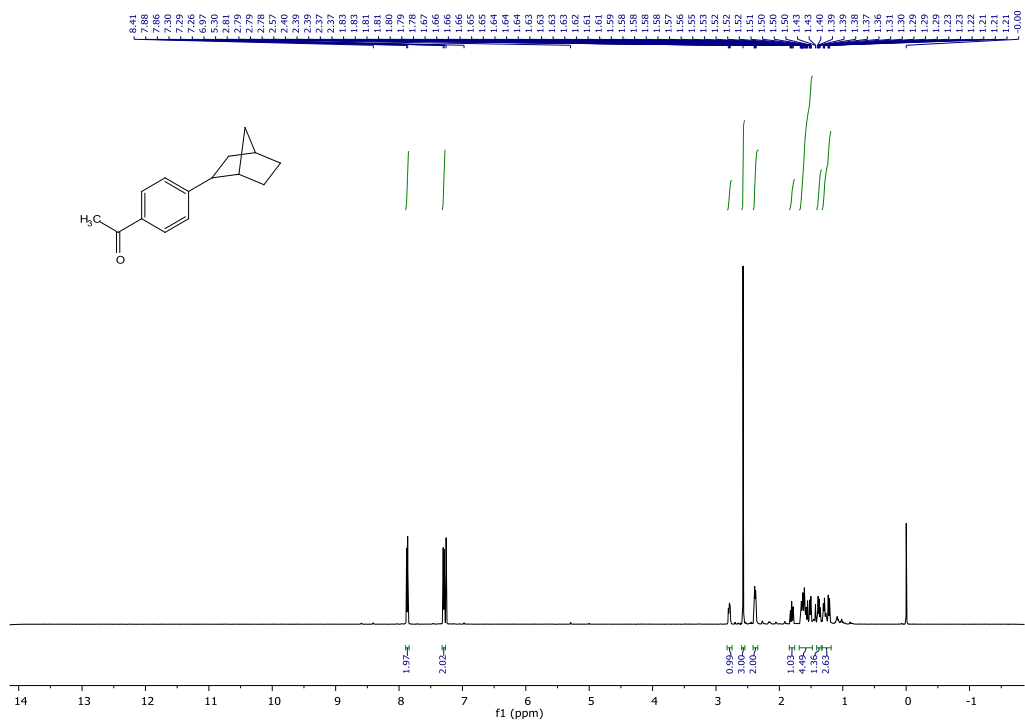

<sup>1</sup>H NMR spectrum of (±)-1-(4-(bicyclo[2.2.1]heptan-2-yl)phenyl)ethanone (3j)

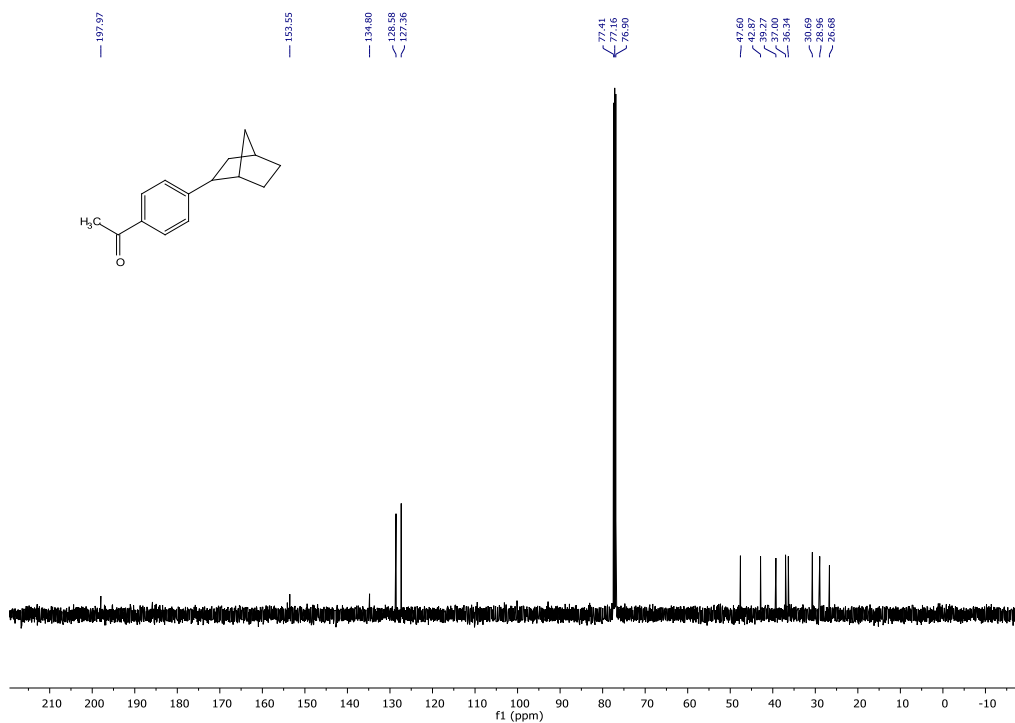

<sup>13</sup>C {<sup>1</sup>H} NMR spectrum of (±)-1-(4-(bicyclo[2.2.1]heptan-2-yl)phenyl)ethanone (3j)

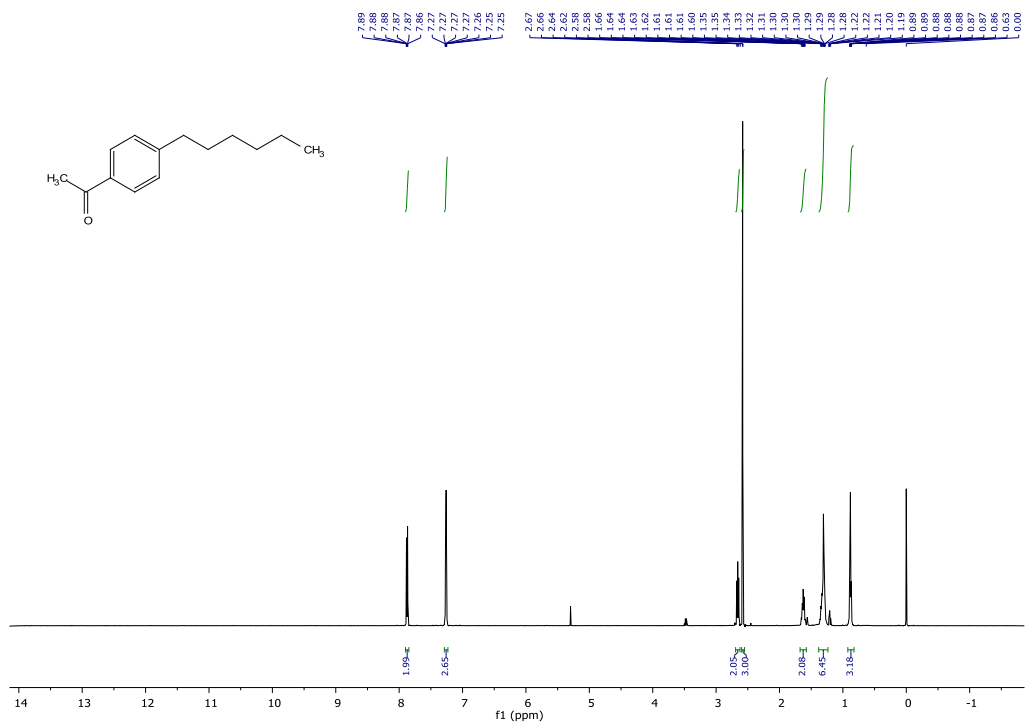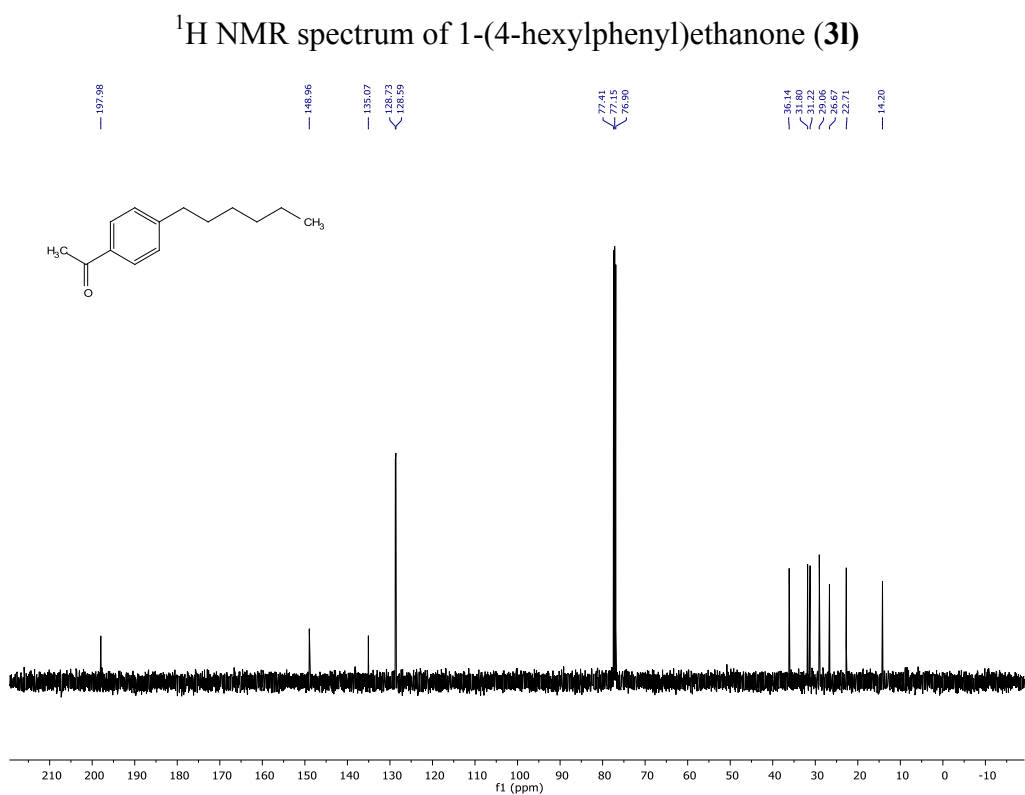

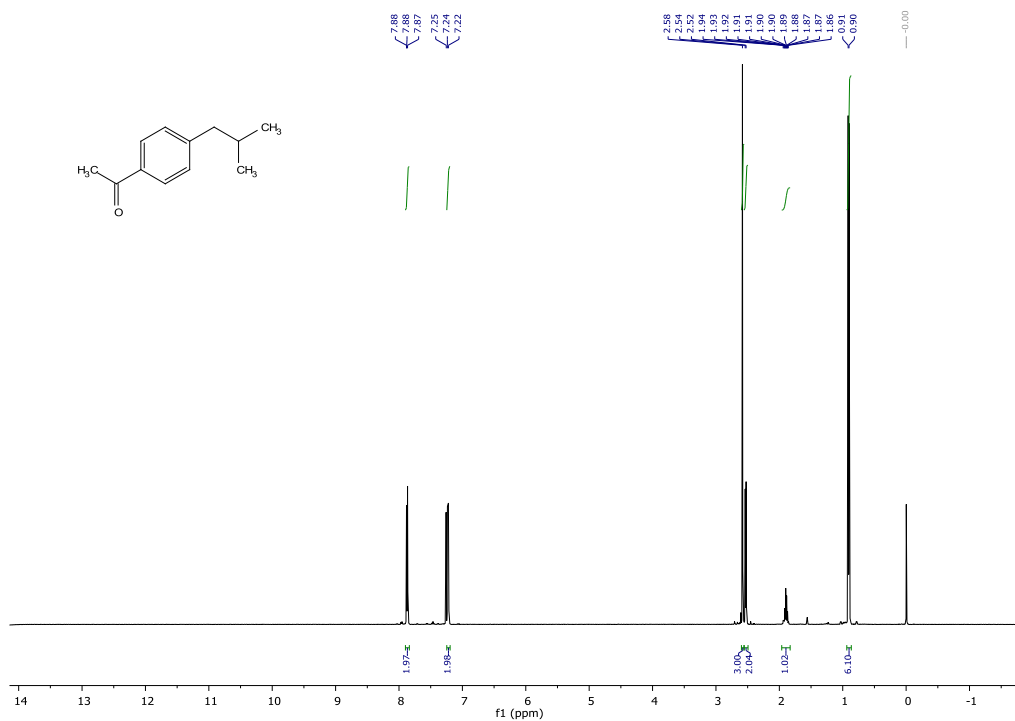

**<sup>1</sup>H NMR spectrum of 1-(4-isobutylphenyl)ethanone (3m)**

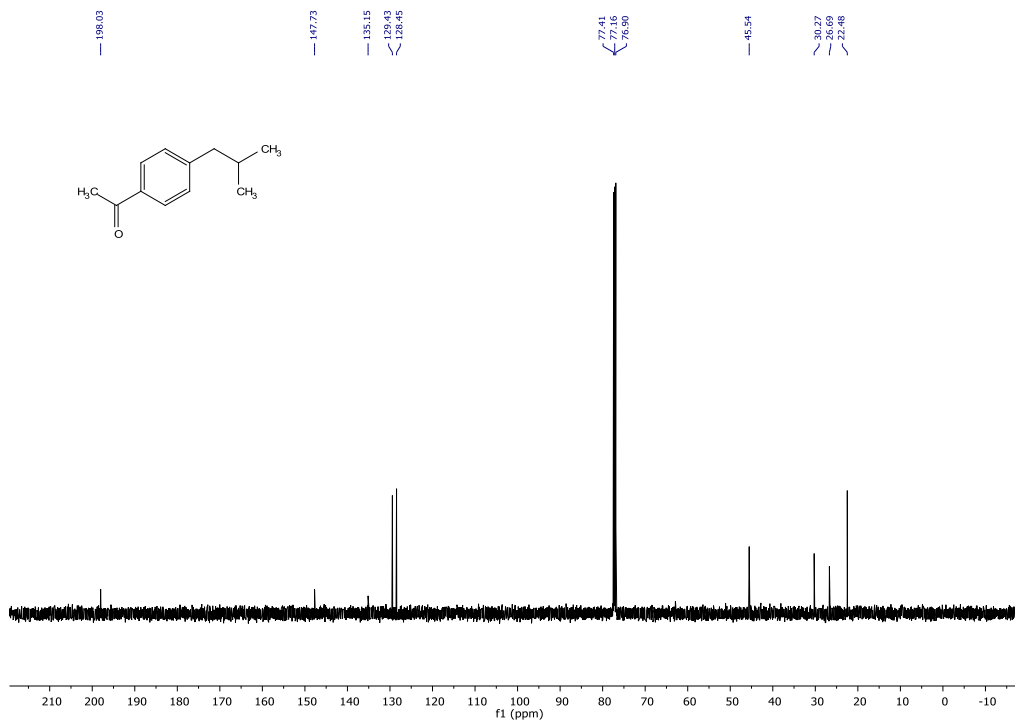

**<sup>13</sup>C {<sup>1</sup>H} NMR spectrum of 1-(4-isobutylphenyl)ethanone (3m)**



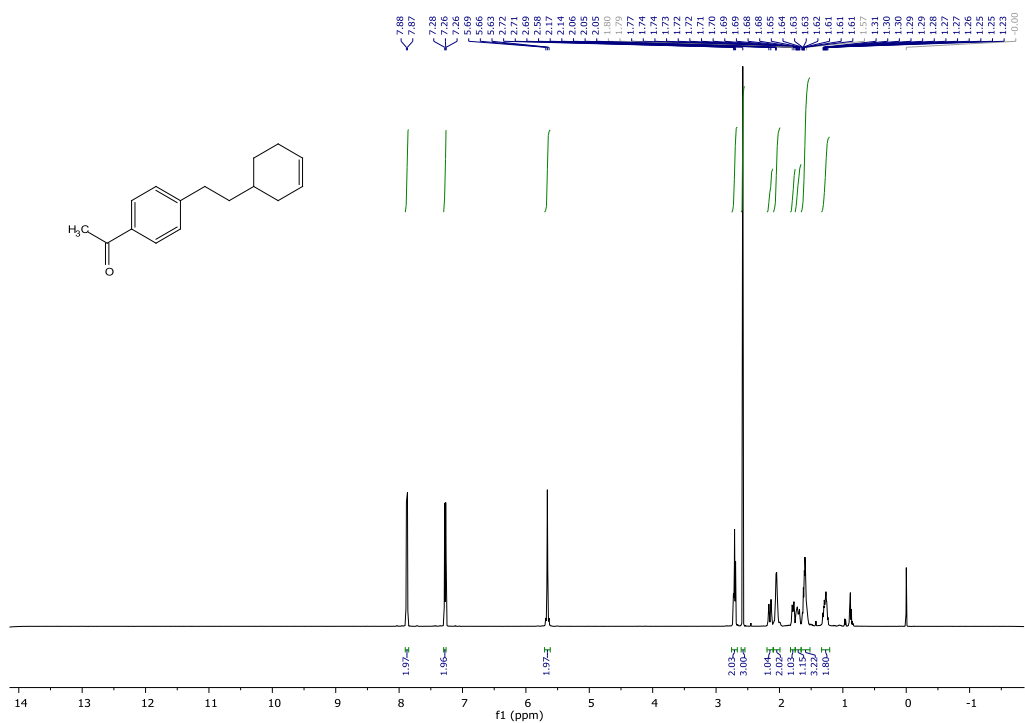

<sup>1</sup>H NMR spectrum of 1-(4-(2-(cyclohex-3-en-1-yl)ethyl)phenyl)ethanone (**3n**)

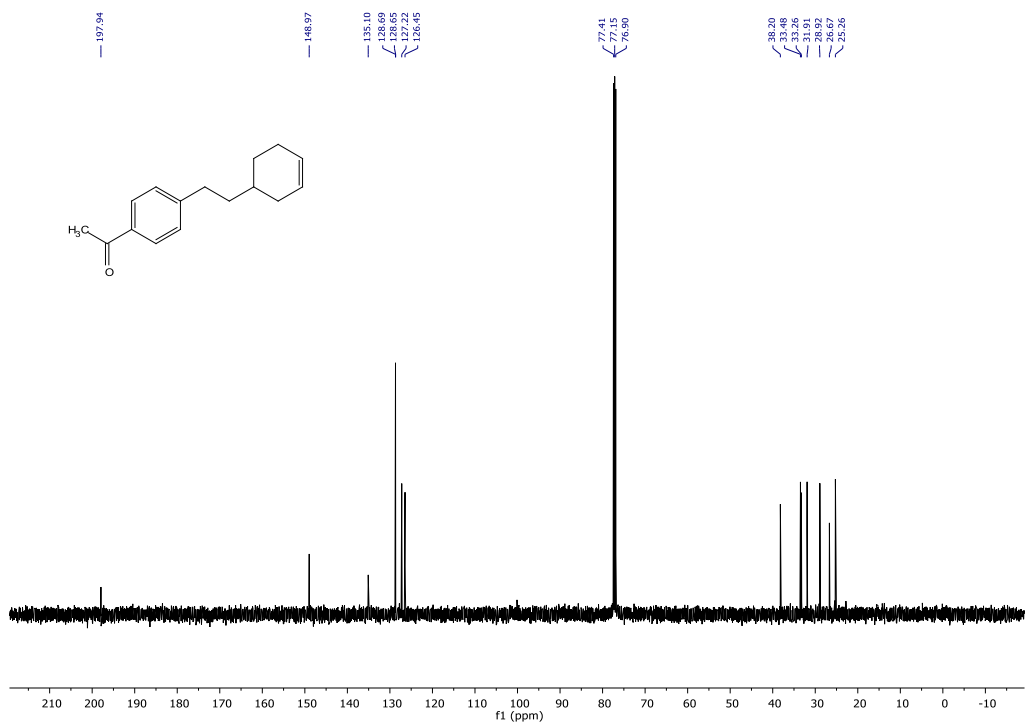

<sup>13</sup>C {<sup>1</sup>H} NMR spectrum of 1-(4-(2-(cyclohex-3-en-1-yl)ethyl)phenyl)ethanone (**3n**)

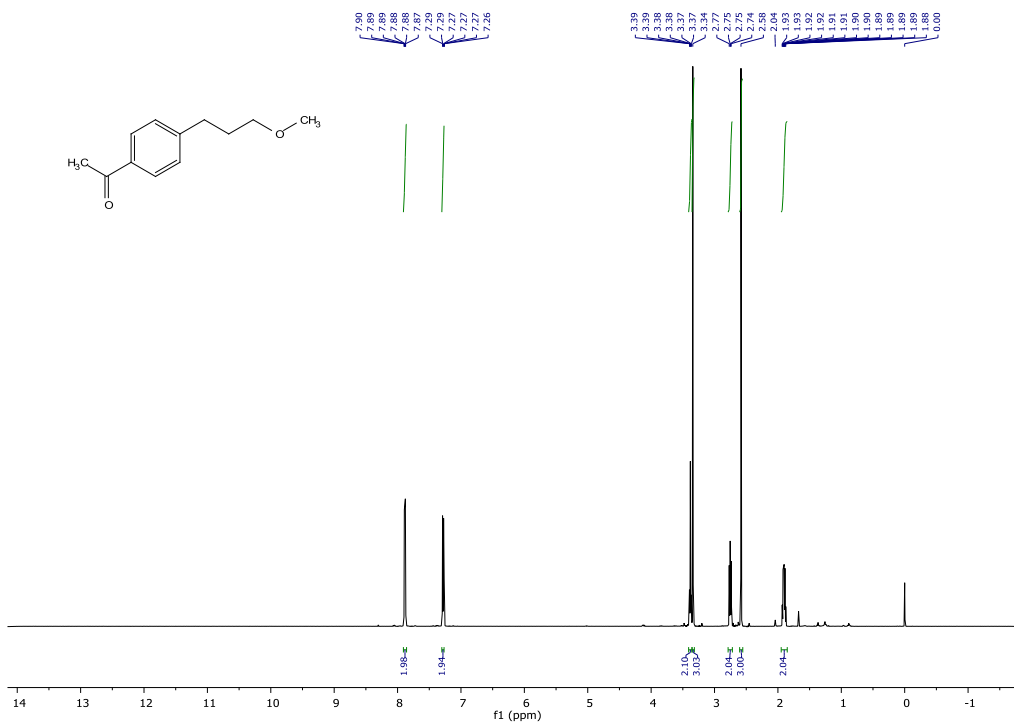

<sup>1</sup>H NMR spectrum of 1-(4-(3-methoxypropyl)phenyl)ethanone (**30**)

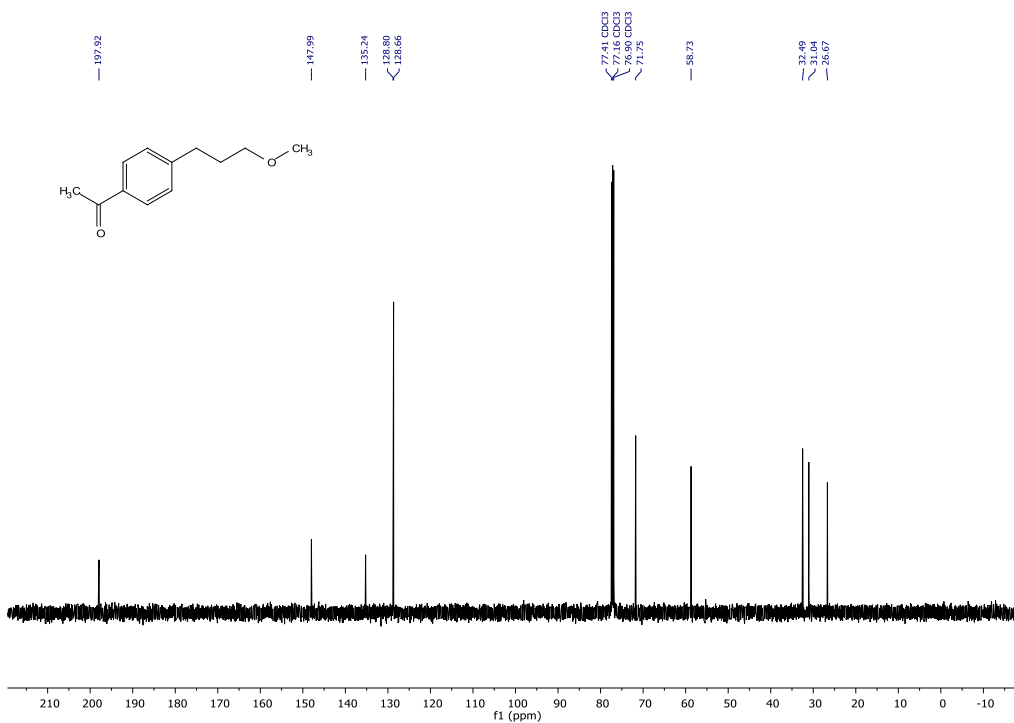

<sup>13</sup>C {<sup>1</sup>H} NMR spectrum of 1-(4-(3-methoxypropyl)phenyl)ethanone (**30**)

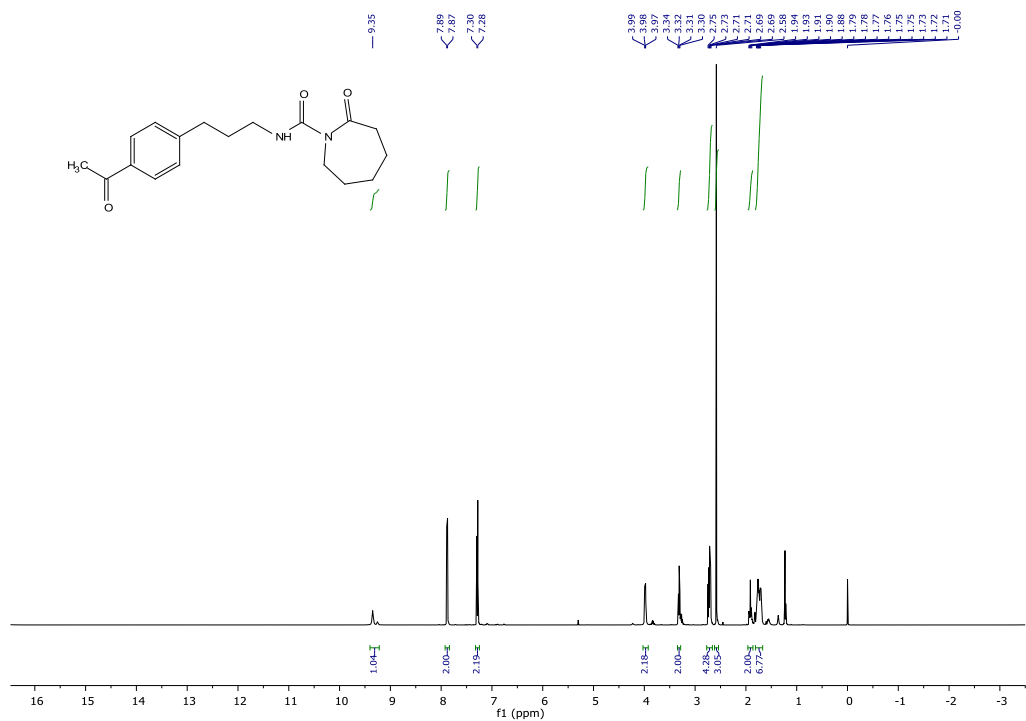

<sup>1</sup>H NMR spectrum of N-(3-(4-acetylphenyl)propyl)-2-oxoazepane-1-carboxamide (**3p**)

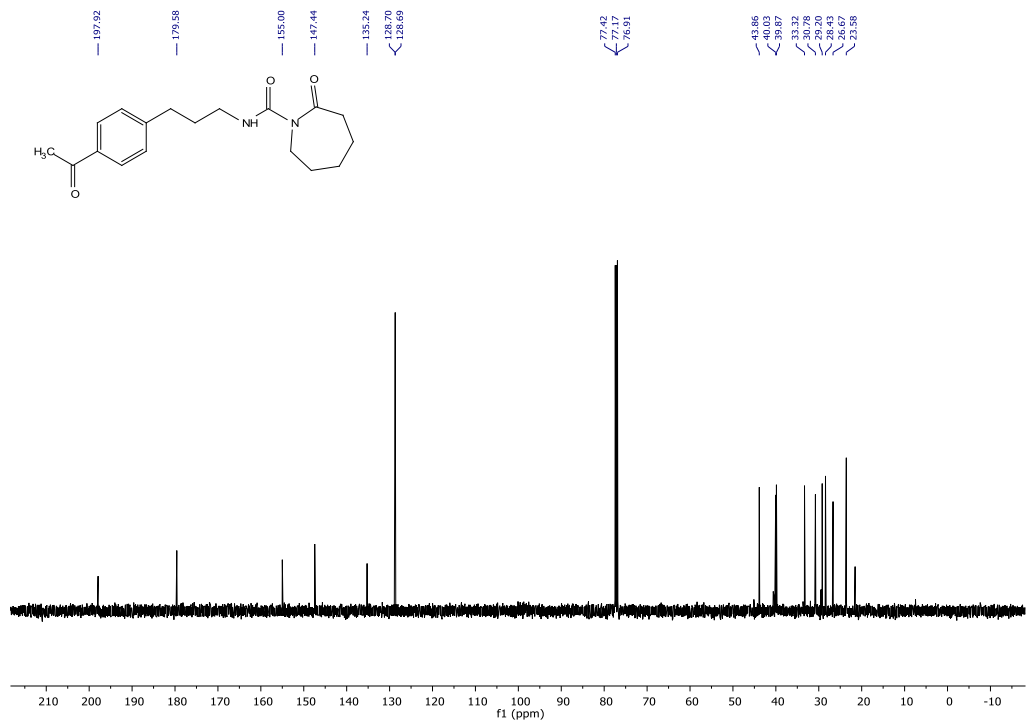

<sup>13</sup>C {<sup>1</sup>H} NMR spectrum of N-(3-(4-acetylphenyl)propyl)-2-oxoazepane-1-carboxamide (**3p**)

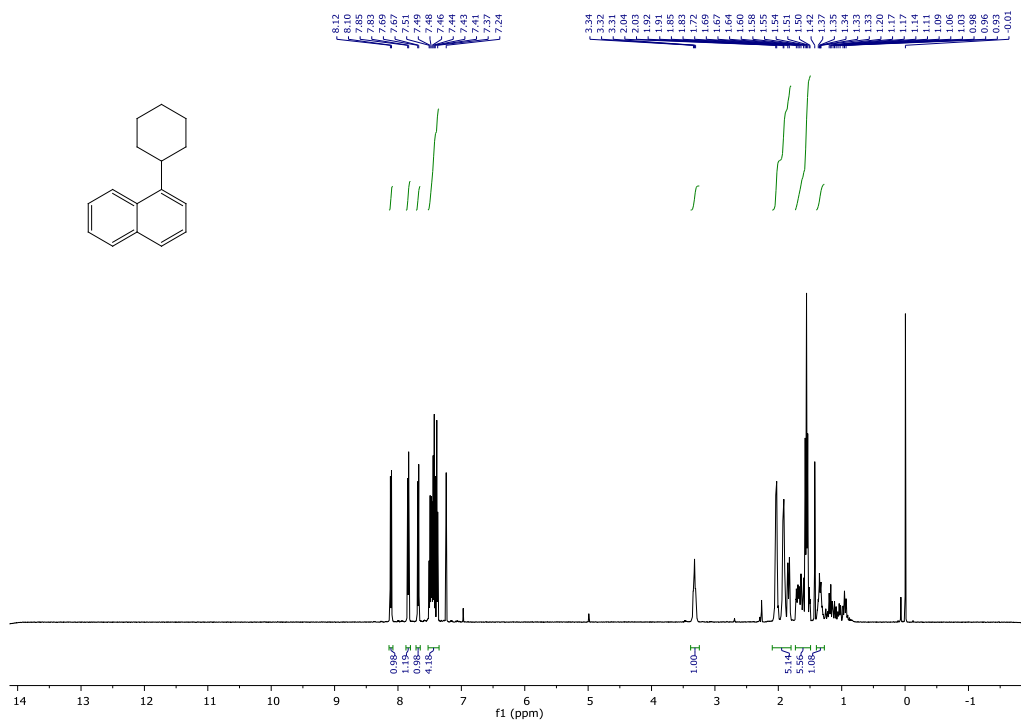

<sup>1</sup>H NMR spectrum of 1-cyclohexylnaphthalene (**3q**)

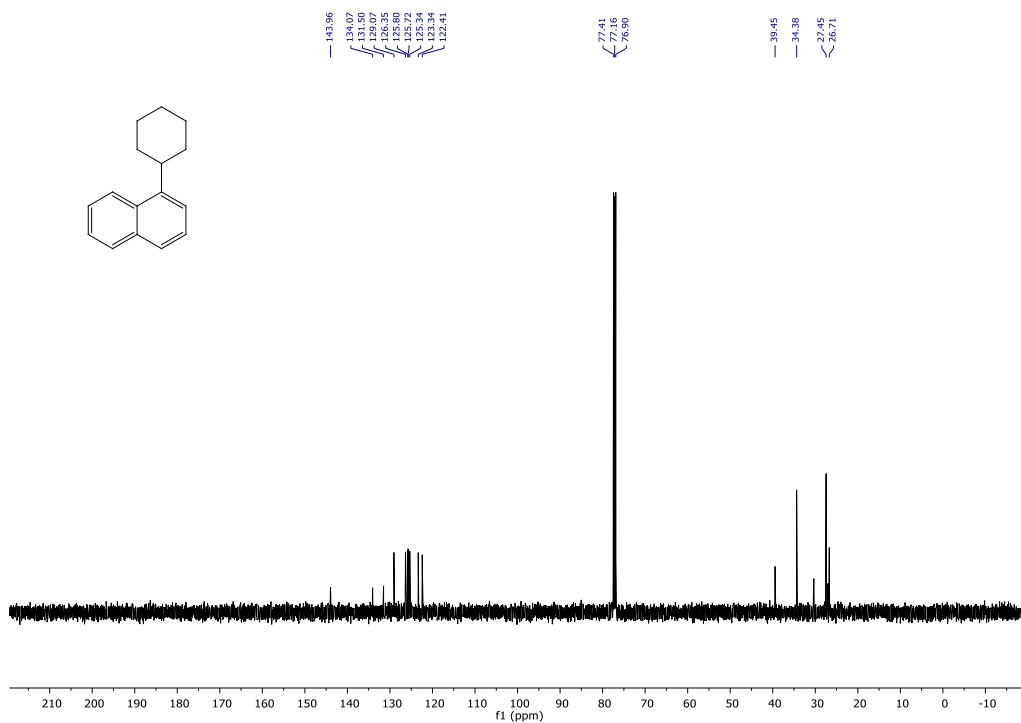

<sup>13</sup>C {<sup>1</sup>H} NMR spectrum of 1-cyclohexylnaphthalene (**3q**)

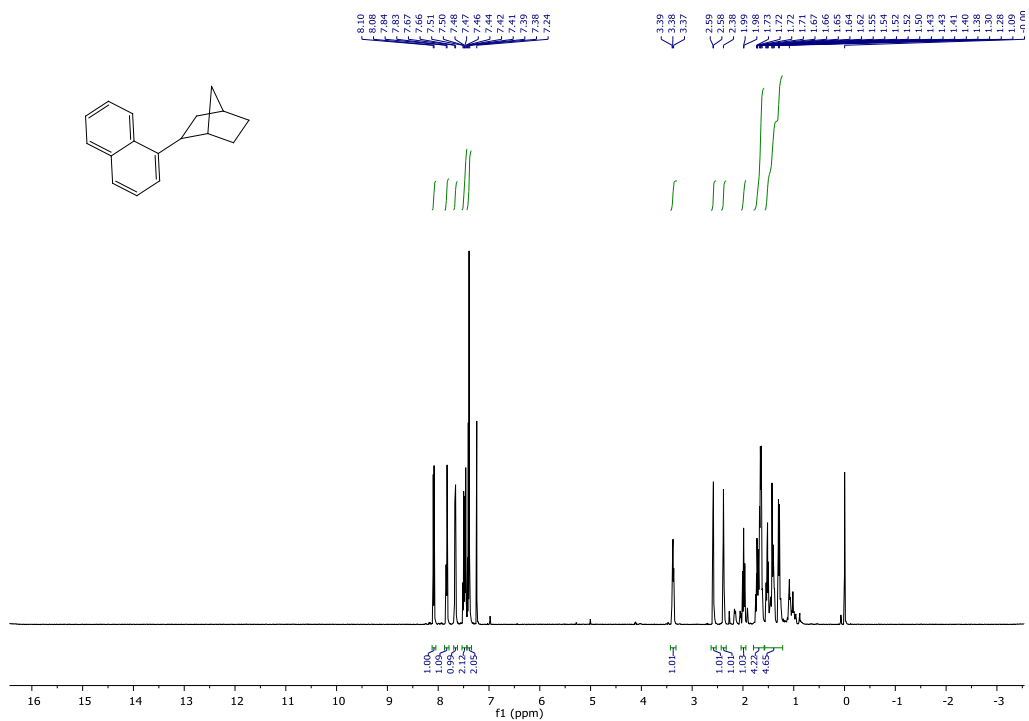

<sup>1</sup>H NMR spectrum of (±)-1-bicyclo[2.2.1]heptan-2-yl)naphthalene (3s)

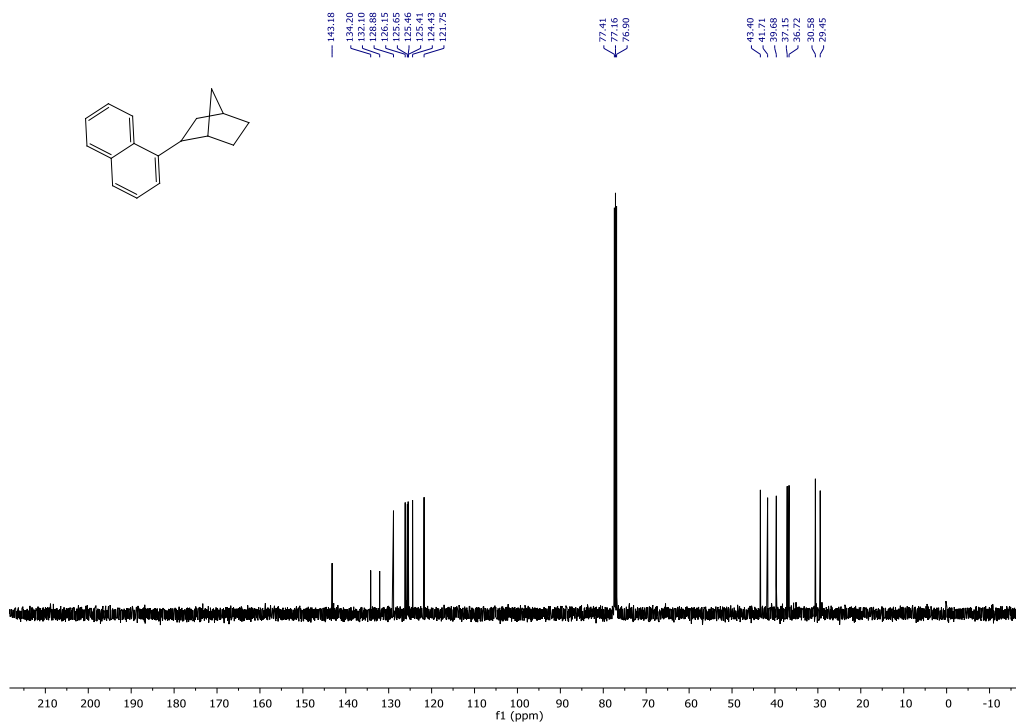

<sup>13</sup>C {<sup>1</sup>H} NMR spectrum of (±)-1-bicyclo[2.2.1]heptan-2-yl)naphthalene (3s)

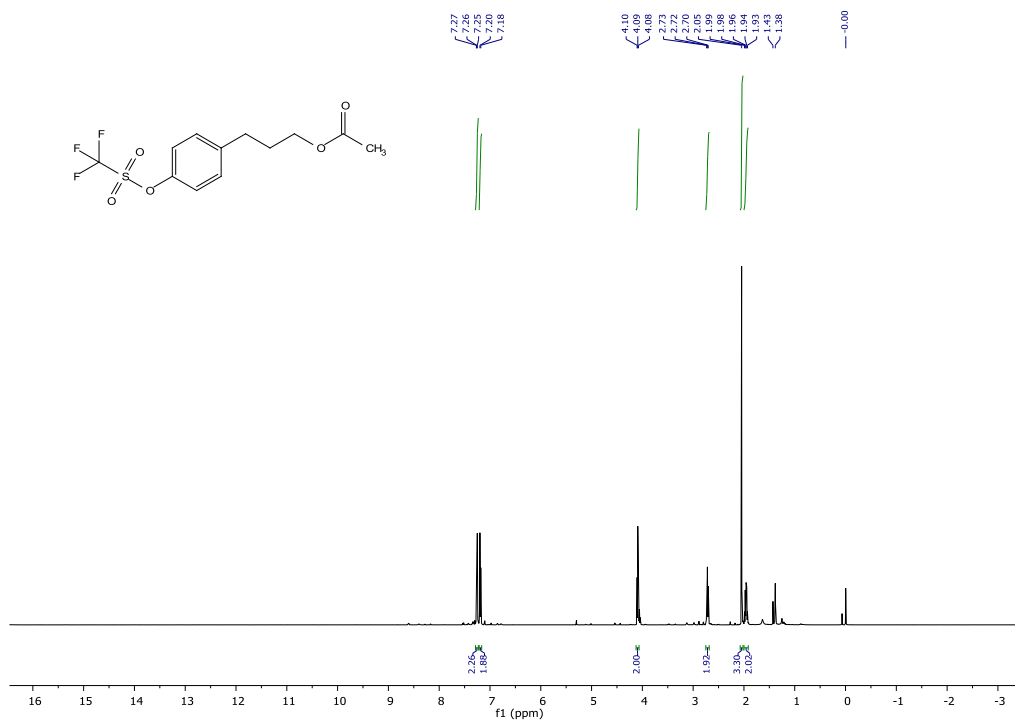

<sup>1</sup>H NMR spectrum of 3-(4-(((trifluoromethyl)sulfonyl)oxy)phenyl)propyl acetate (**3t**)

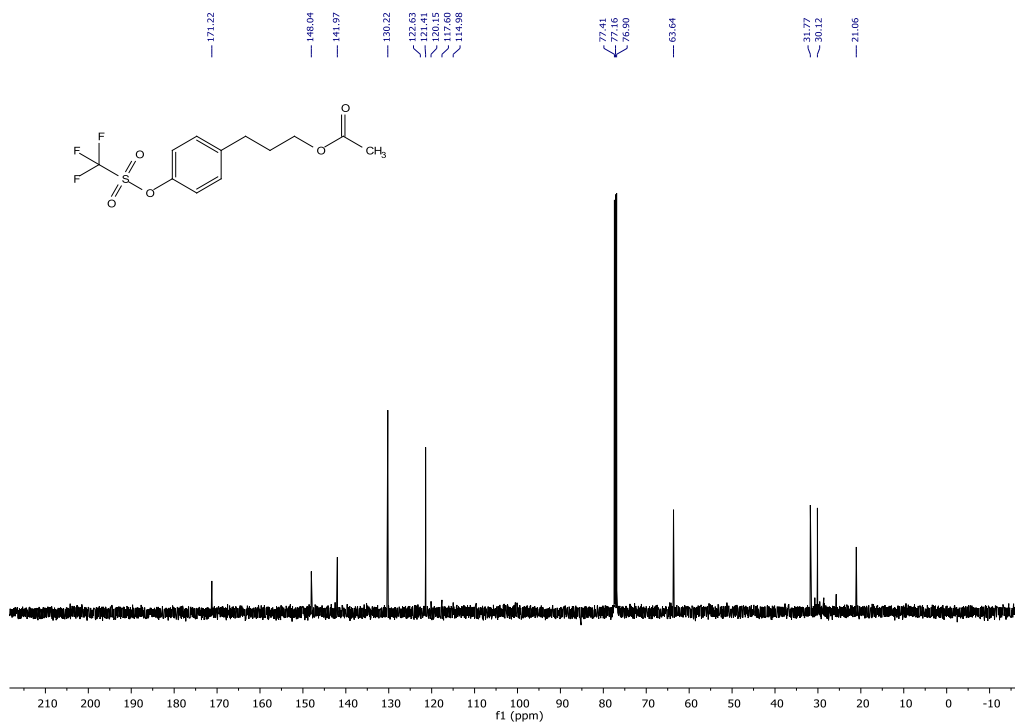

<sup>13</sup>C {<sup>1</sup>H} NMR spectrum of 3-(4-(((trifluoromethyl)sulfonyl)oxy)phenyl)propyl acetate (**3t**)

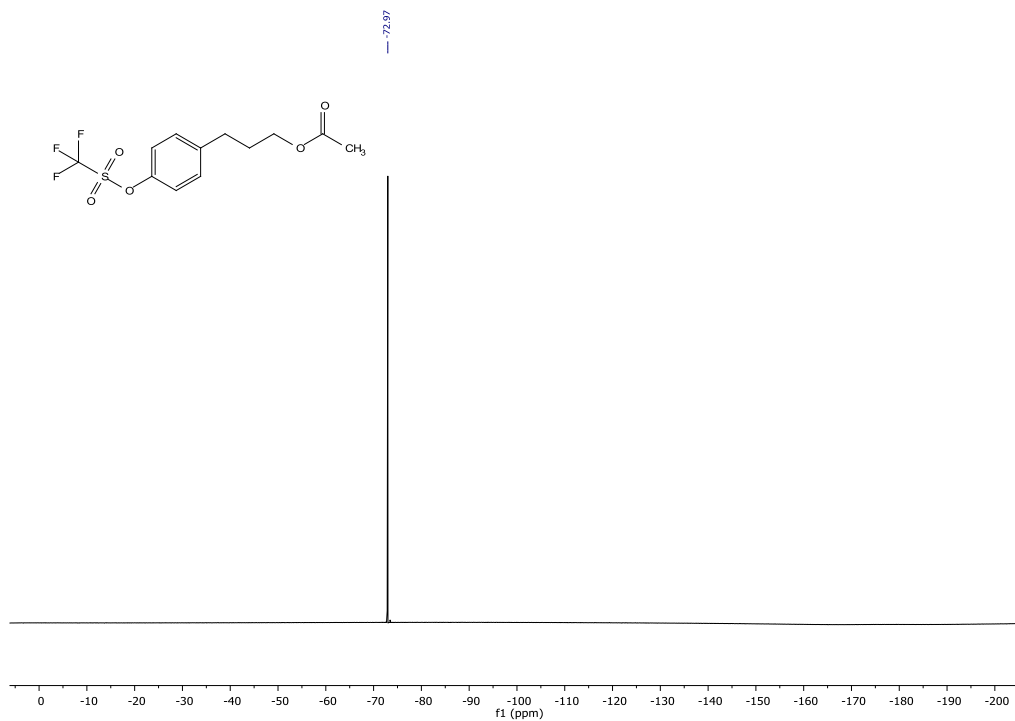

$^{19}\text{F}$  NMR spectrum of 3-(4-(((trifluoromethyl)sulfonyl)oxy)phenyl)propyl acetate (**3t**)
